# Supplementary material
Source: PubMed Central journal article supplement (PMC10958536)
Supplement: NIHPP2023.11.20.567870v2-supplement-1.pdf [file NIHPP2023.11.20.567870v2-supplement-1.pdf]

## **Supplementary Figures:**

### **Development and characterization of a low intensity vibrational system for microgravity studies**

Omor M. Khan<sup>1</sup>, Will Gasperini<sup>1</sup>, Chess Necessary<sup>2</sup>, Zach Jacobs<sup>2</sup>, Sam Perry<sup>2</sup>, Jason Rexroat<sup>2</sup>, Kendall Nelson<sup>2</sup>, Paul Gamble<sup>2</sup>, Twyman Clements<sup>2</sup>, Maximilien DeLeon<sup>3</sup>, Sean Howard<sup>1</sup>, Anamaria Zavala<sup>1</sup>, Mary Farach-Carson<sup>3</sup>, Elizabeth Blaber<sup>4</sup>, Danielle Wu<sup>3</sup>, Aykut Satici<sup>1</sup>, Gunes Uzer<sup>1</sup>

<sup>1</sup>Department of Mechanical and Biomedical Engineering, Boise State University,

<sup>2</sup>Space Tango, Inc., 611 Winchester Lexington KY 40505, United States,

<sup>3</sup>Department of Bioengineering, Rice University, <sup>4</sup>Center for Biotechnology and Rd.

Interdisciplinary Studies, Department of Biomedical Engineering, Rensselaer

Polytechnic Institute

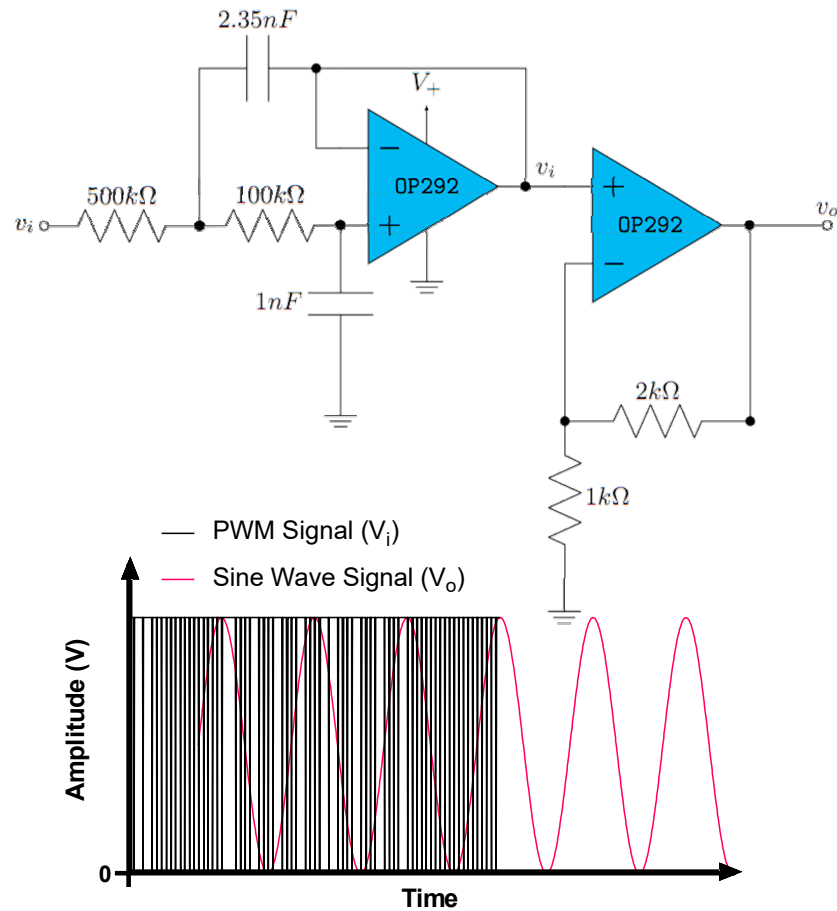

**Supplementary Figure 1:** Custom circuit diagram (top) to generate sine wave signal from Teensy 4.0 microcontroller. PWM signal (square wave) coming from the microcontroller is filtered by the demodulating circuit to get a sine wave output that will be used as an input signal for the LIV.

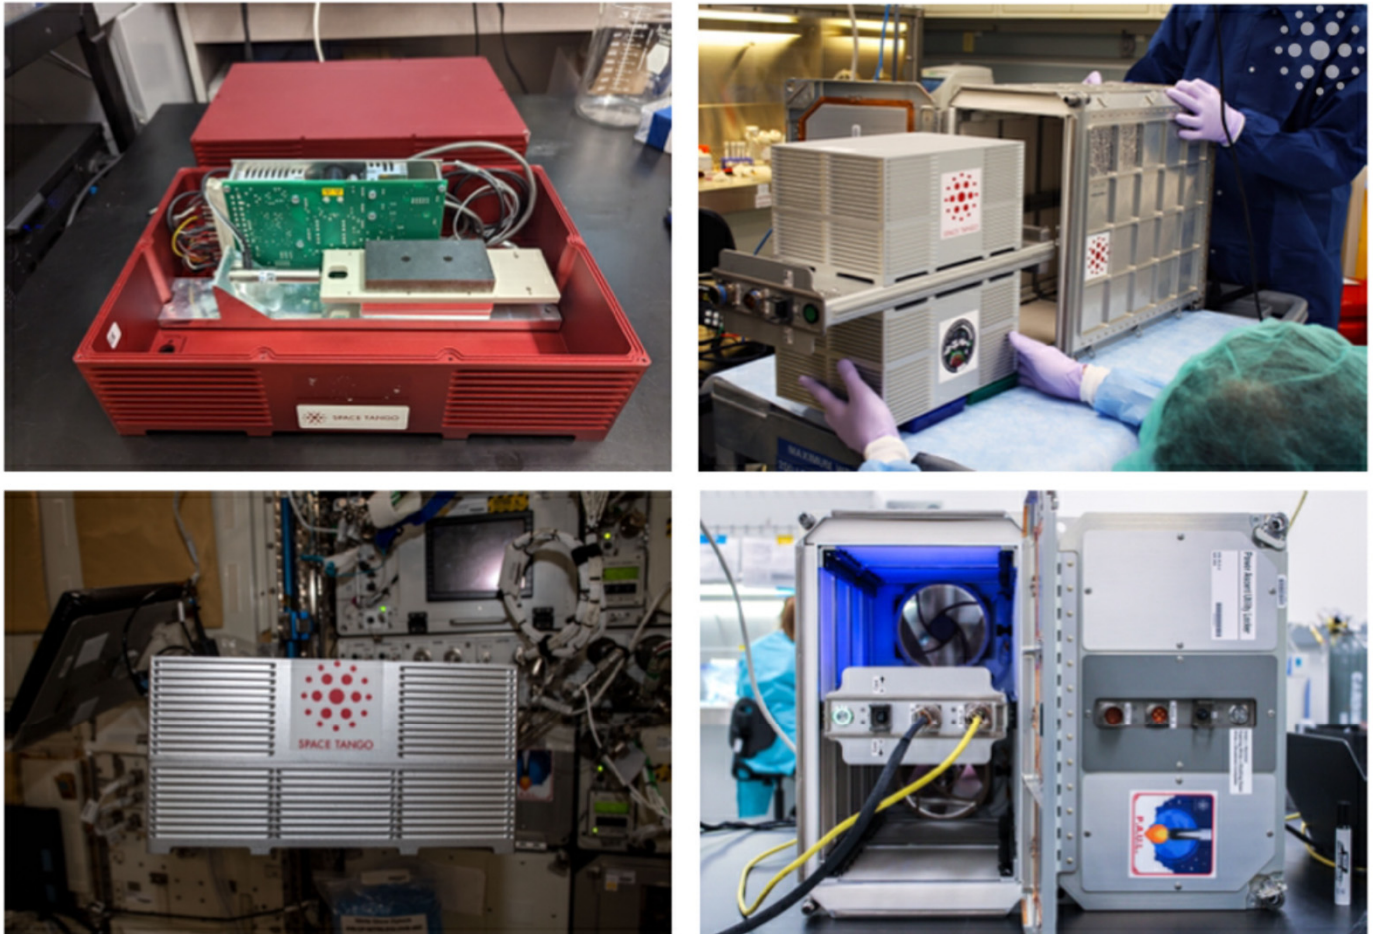

**Supplementary Figure 2:** CubeLab (top and bottom-left) facility that will house the vibrational bioreactor and the biological samples. The PAUL (top and bottom-right) facility designed to house and provide mechanical, electrical, and network interface from the outside

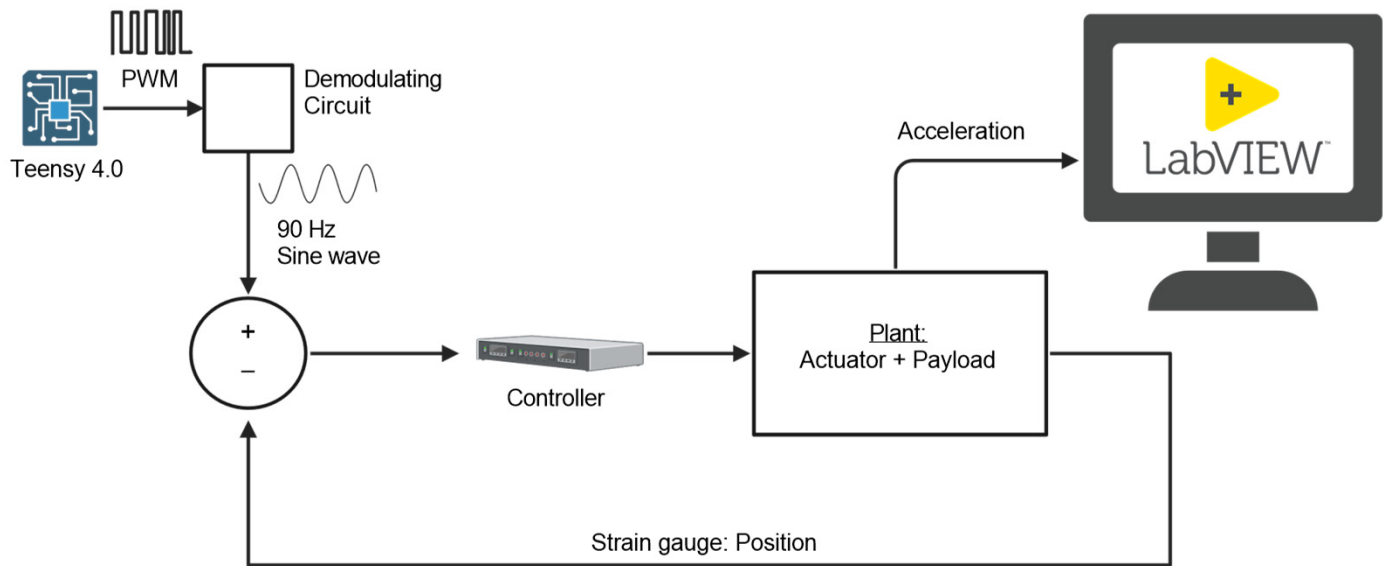

**Supplementary Figure 3:** Experiment schematic of the LIV regimen from signal generation to data acquisition and visualization in labVIEW

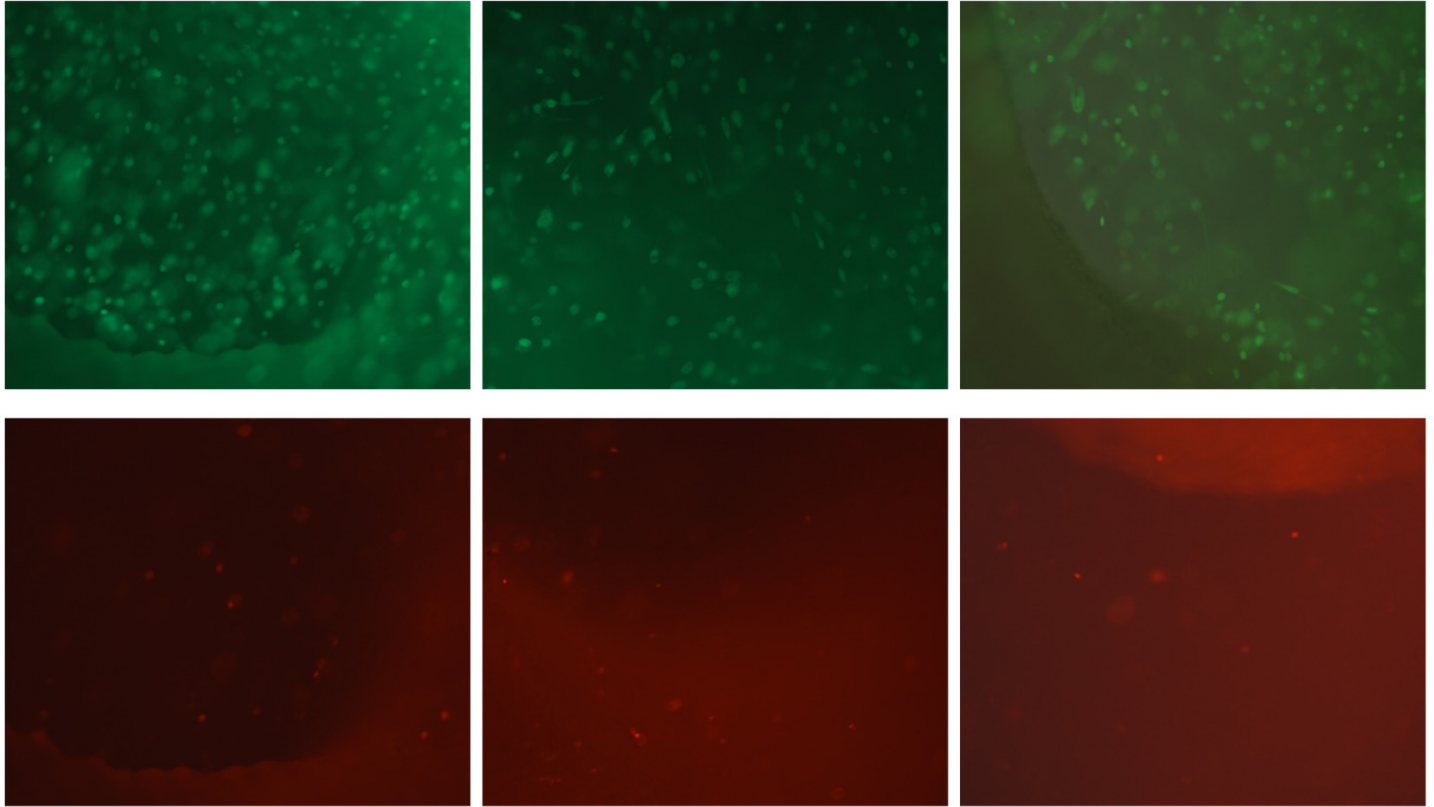

**Supplementary Figure 4:** Additional Live/Dead assay images across various scaffold locations and samples, demonstrating a predominance of live cells over dead ones. These images further validate the biocompatibility and cell-supportive nature of the scaffold materials used in the study.

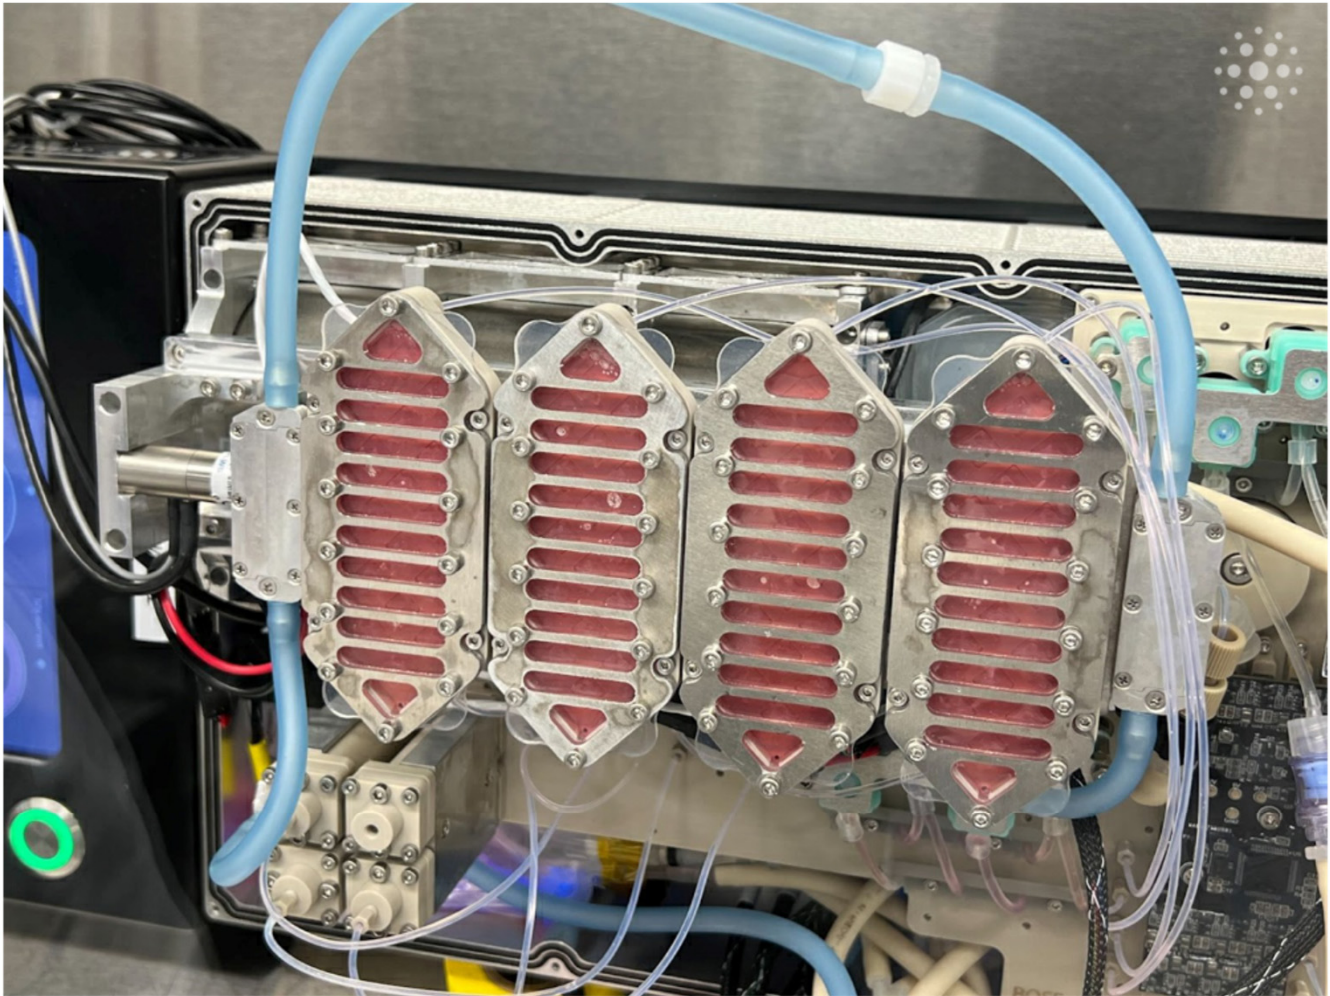

**Supplementary Figure 5:** CubeWells within the CubeLab module, showcasing the custom-designed well plates developed for holding hydrogel-encapsulated scaffolds. The design incorporates a secure lid system to prevent sample spillage during spaceflight, with scaffolds protected by a biocompatible PDMS layer, further sealed by a metal lid for added safety and integrity during experiments in space.
